# Supplementary material
Source: PubMed Central journal article supplement (PMC3354055)

S1a

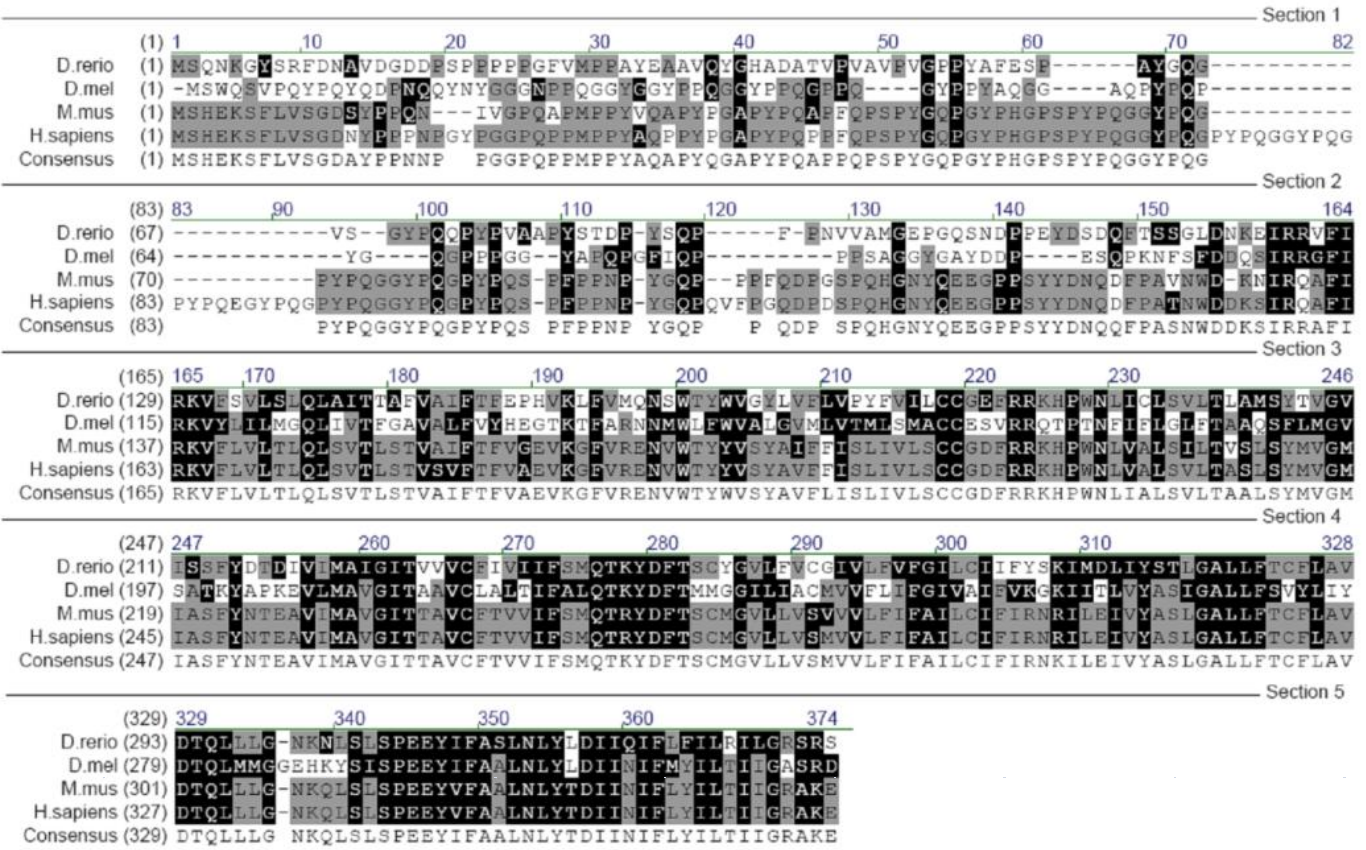

S1b

|              | TMBIM6 | TMBIM3 | TMBIM5 | TMBIM2 | TMBIM1 | TMBIM4 |
|--------------|--------|--------|--------|--------|--------|--------|
| TMBIM6/BI-1  | -      | 10(46) | 14(47) | 13(42) | 12(41) | 23(36) |
| TMBIM3/GRINA | -      | -      | 13(20) | 38(50) | 40(53) | 22(54) |
| TMBIM5/GHITM | -      | -      | -      | 14(25) | 15(25) | 11(42) |
| TMBIM2/LFG   | -      | -      | -      | -      | 46(50) | 24(50) |
| TMBIM1/Recs1 | -      | -      | -      | -      | -      | 22(26) |
| TMBIM4/GAAP  | -      | -      | -      | -      | -      | -      |

S1c

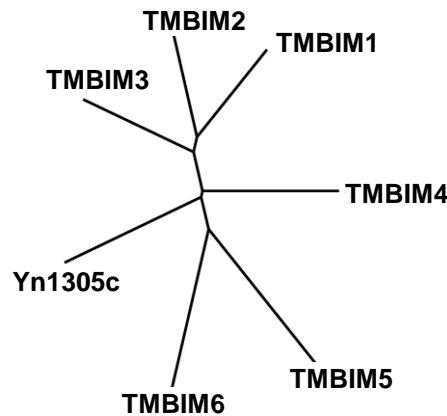

S1d

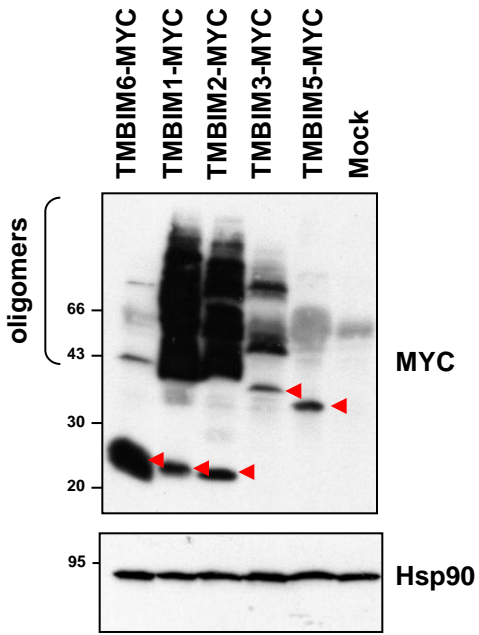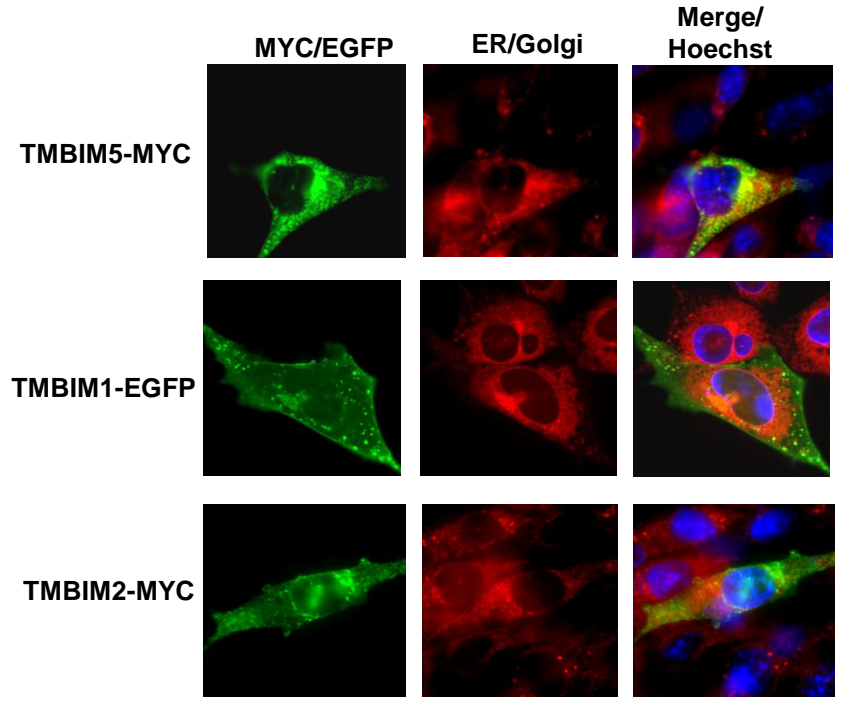

S2a

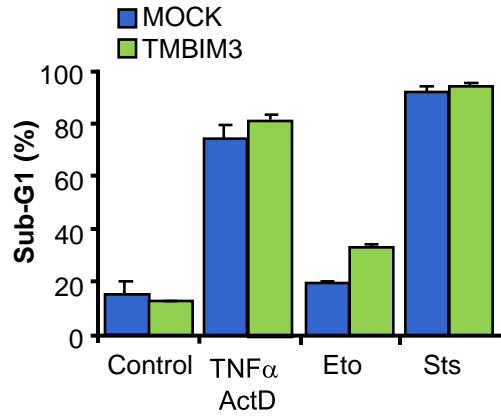

S2b

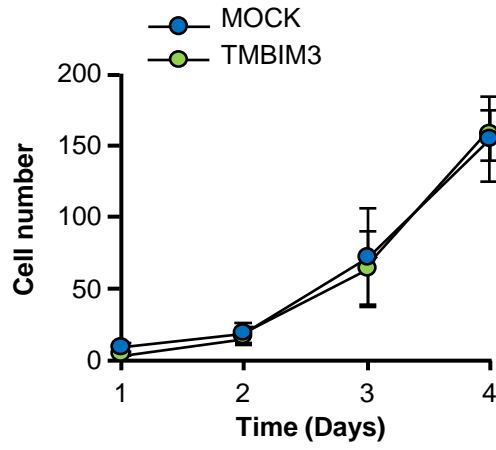

S3a

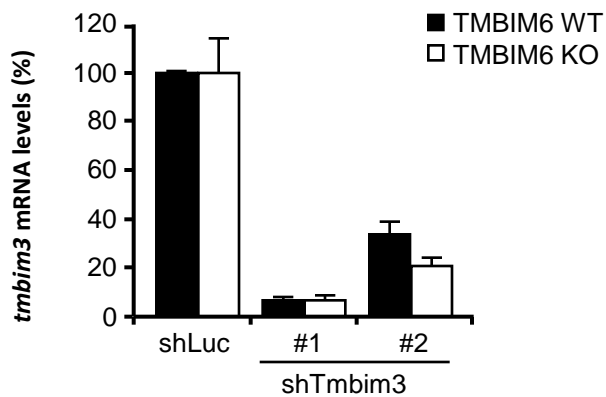

S3b

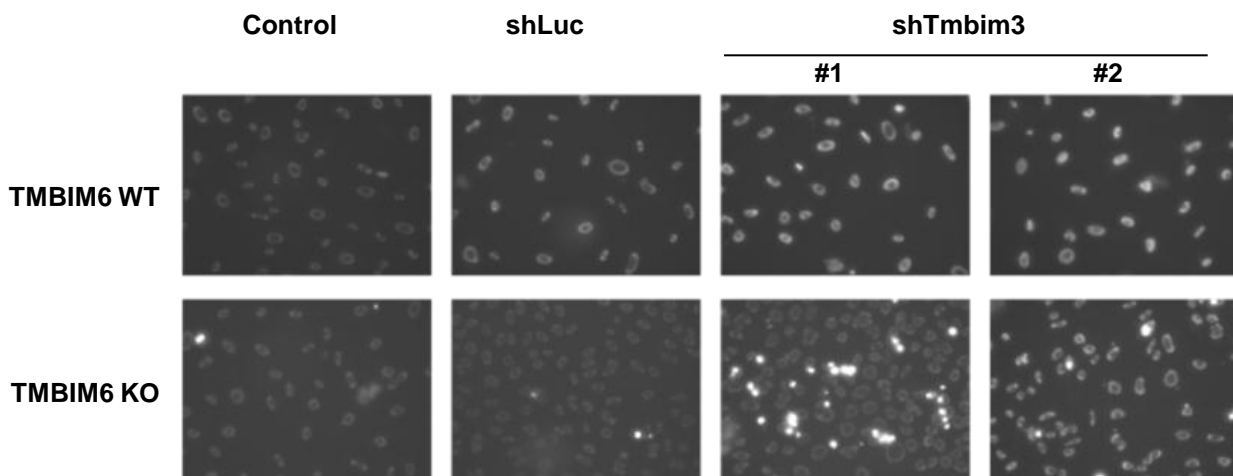

S3c

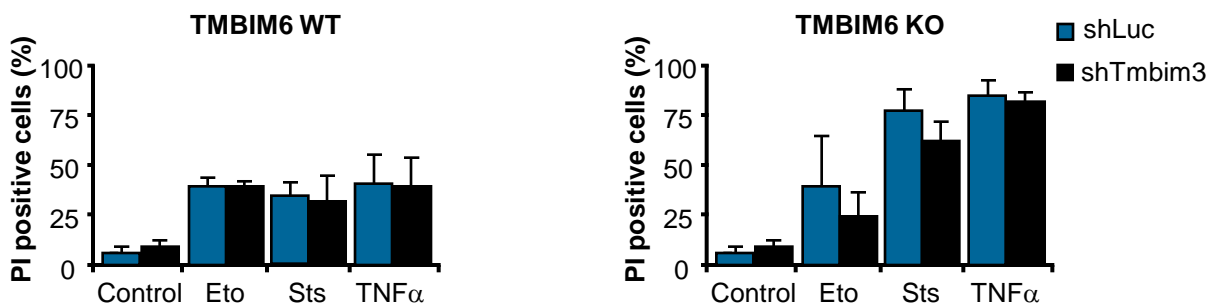

S4a

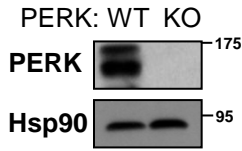

S4b

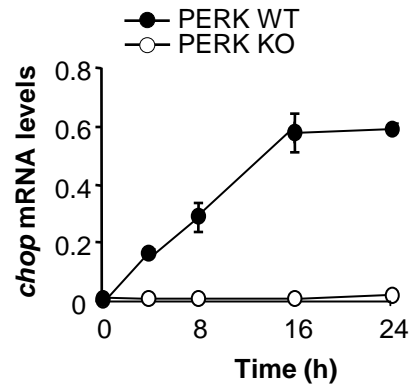

S4c

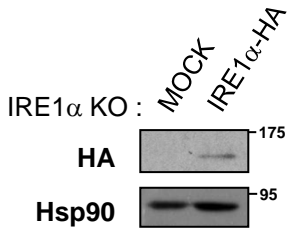

S4d

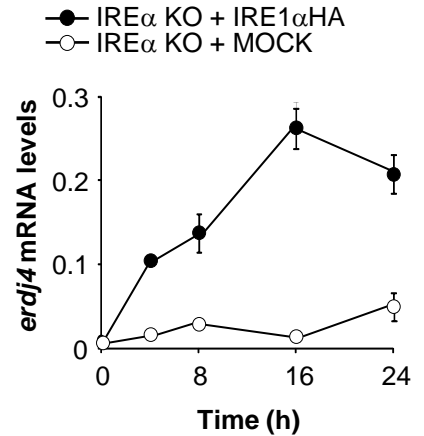

S4e

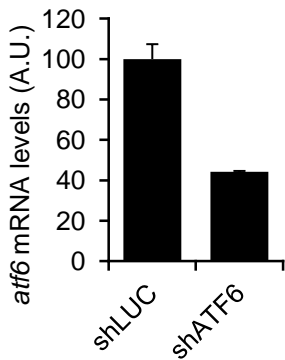

S4f

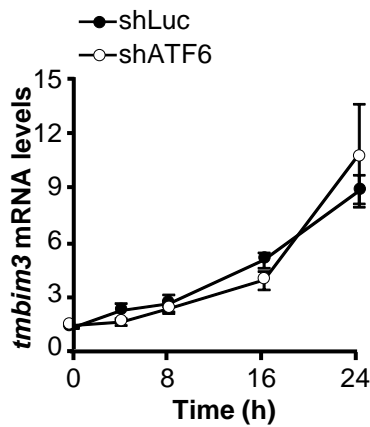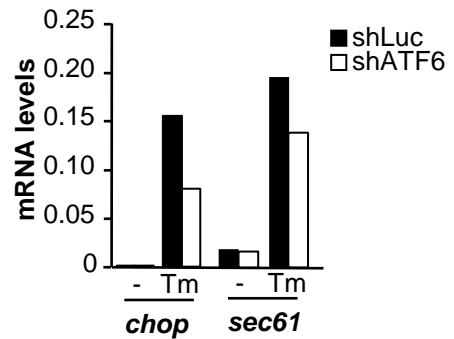

S4g

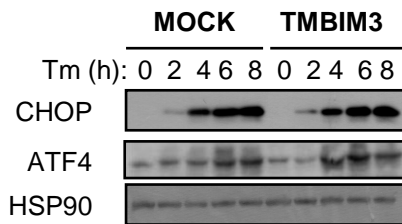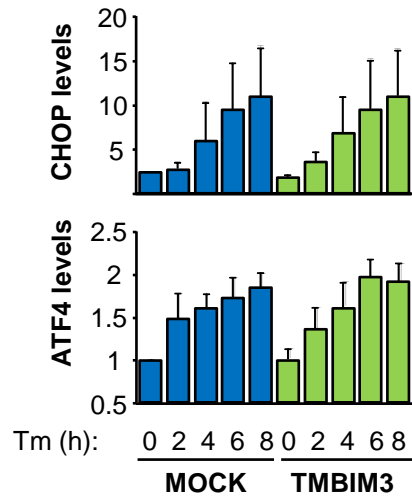

S5a

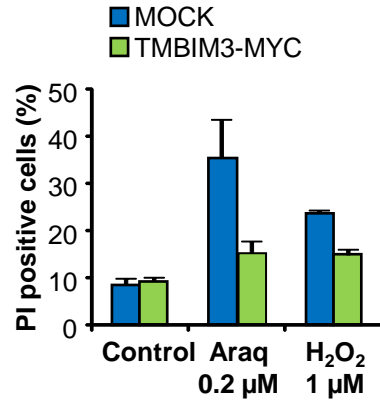

S5b

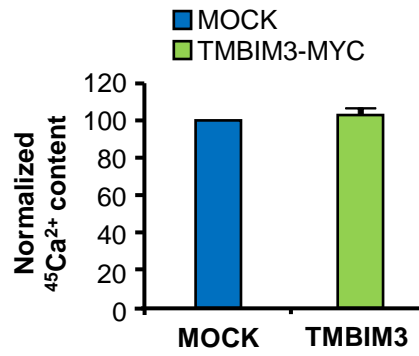

S5c

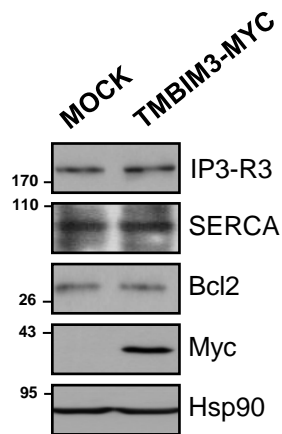

S6a

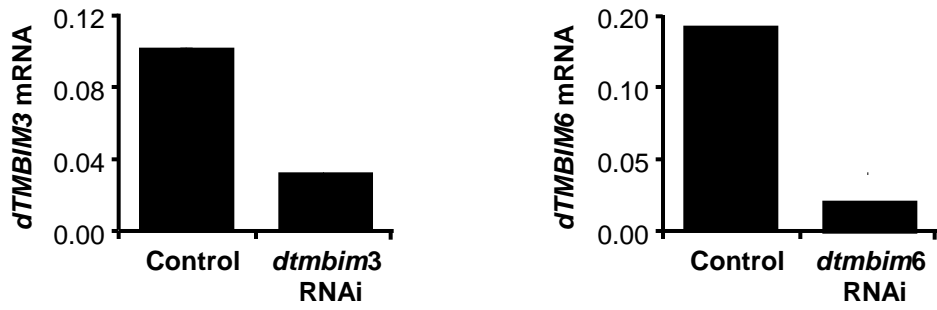

S6b

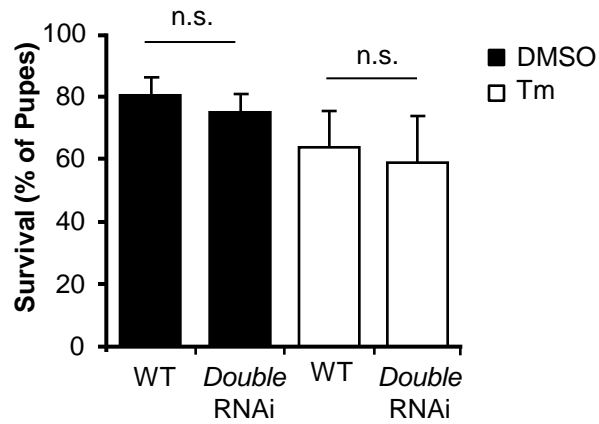

S6c

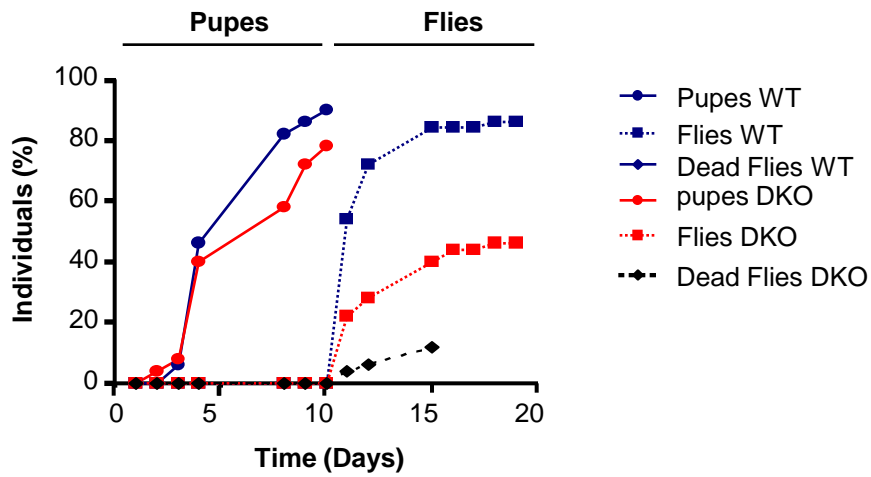

S7a

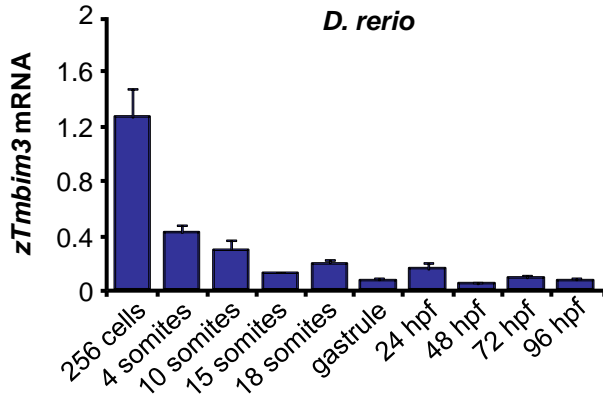

S7b

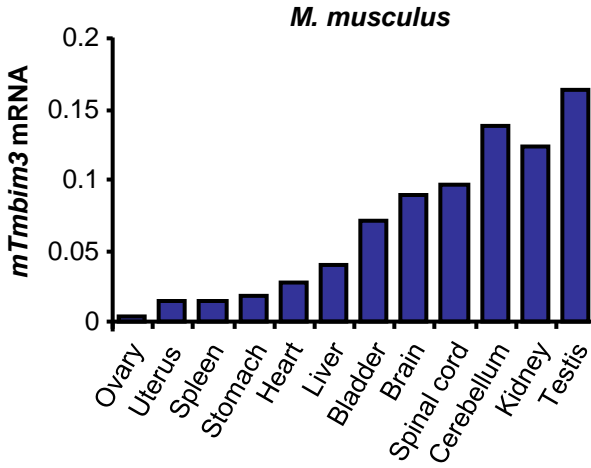

S7c

GTGAACAACCGACTAGTTTTATCTTCCTCGGCTGTGTTTTTCAGTCTGCTCCAGTGTATGTTCTCAGAATAAGGGATACAGGCCGTTTTTGACAATGCTGTGGATGGGGATGATC  
 CTTCACCGCCACCACCACCGGGTTTCGTGATGCGCTCCTGCTTATGAAGCCGCTGTTTCAGTACGCGGCATGCAGATGCTACAGTCCCCGTGGCTGTTCAGTCGGACC GCCG  
 TACGCTTTTGGAAGTCTGCGTACGGACAGGGAGTATCCGGATACCCACAGCAGCCGATCCAGTGGCCGCTCCATACAGCACAGATCCATACTCACAGCCGTTTCCCAA  
 CGTGGTGGCGATGGGTGAACCAGGACAGAGCGACGATCCTCCAGAATAATGACAGTGATCAGTTCCTCCAGCTCTGGACTGGACAATAAAGAGATCAGACGCGTGTTCATCC  
 GAAAGGTCTTCAGTGTTTTGAGTCTTCAGCTGGCCATCACCAGTGCCTTTGTTGGCCATCTTCACCTTCGAGCCTCATGTAAAGCTGTTTCGTGATGCAGAACTCTGGACG  
 TATTGGGTGGGATATCTGGTGTTCCTGGTGCCGATTTTCGTGATCCTCTGCTGCGGAGAGTTTCGCGCAAACACCCCTGAAACCTCATCTGTTTGTGCGTGTACTCT  
 GCGCATGTCCTACATGGTCGGAGTATTTCCAGCTCTACGACACTGATATCGTGATAATGGCGATCGGCATTACAGTGGTGGTCTGCTTTACTGTTCATCATCTTCTCCA  
 TGCAGACCAAGTATGACTTCACCTTCCTGTTACGGGGTCTGTTTCGTTTGGCGCATCGTCTGTTTCGTTCTTTGGGATCCTTTGCATCATCTTCTATAGCAAGATTATGGAC  
 CTCATTTACTCCACGCTGGGAGCTCTTTTATTCACCTGCTTCTGCGGCTGGACACGCAGCTGCTGCTGGGGAACAAGAACTGTCCTCTGAGCCCCGGAGGAATACATCTT  
 CGCTTCCCTCAATCTCTATCTAGACATCATCCAATCTTCTCTTCATCTGAGGATCCTGGGACGGAGCCGAGCTGAAATCACCATCAATTCATCTTTACACATGCTGA  
 GATCAGTAACTAATTTACCATATTCAGTGTAAAGATTTCTACTTCTGAAACATGATGATGATGACCATGTGAAACTGTACATACTTTTATACGTCCTCATGT  
 TATTAATATAGTCTCATCTCTTCTTCTGCTGTGTGTGTGTATATGCGAGTGTGTGTTTTTGTGTTGTGTGTGAATTTGTAAGCGTTTGTGTGTGCGTTTGTGTTTTGT  
 GCATCCATTTATGTGTGCGTGTGTTGAGCTGGCATGTTGTGTGTGCGCACGCATGTGTTTATGTTTTCTTTGCGTGTGTGTGTTTTGTGTGCACTGTGTGTGTGTGTGT  
 GTGTGTGTGTGTTTATAGAGATGCTTTGGGTTCTGTTTTCTCTTTCAGAAGGGAATAAAGTCATTTTATGAACACAAAAA  
 AAAAAAAAAAAAAAAAAAAAAAAAAAAAAAAAAAAAAAAAAAAAAAAAAAAAAAAAAAAAAAAAAAAAAAAAAAAAAAAAAAAAAAAAAAAAAAAAAAAAAAAAAAAAAAAAAAAAAAAAAAAAAAAAAAAAAAA  
 AAAAAAAAAAAAAAAAAAAAAAAAAAAAAAAAAAAAAA

S7d

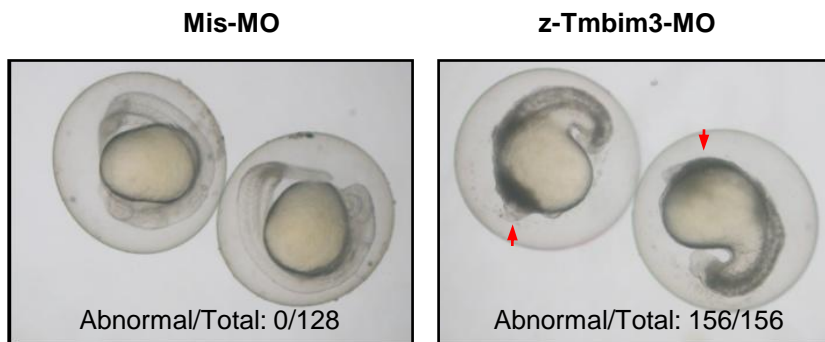

Supplement: cdd2011189x1.pdf [file cdd2011189x1.pdf]
